# Supplementary material
Source: PubMed Central journal article supplement (PMC6124424)
Supplement: jciinsight-3-120422-s057.pdf [file jciinsight-3-120422-s057.pdf]

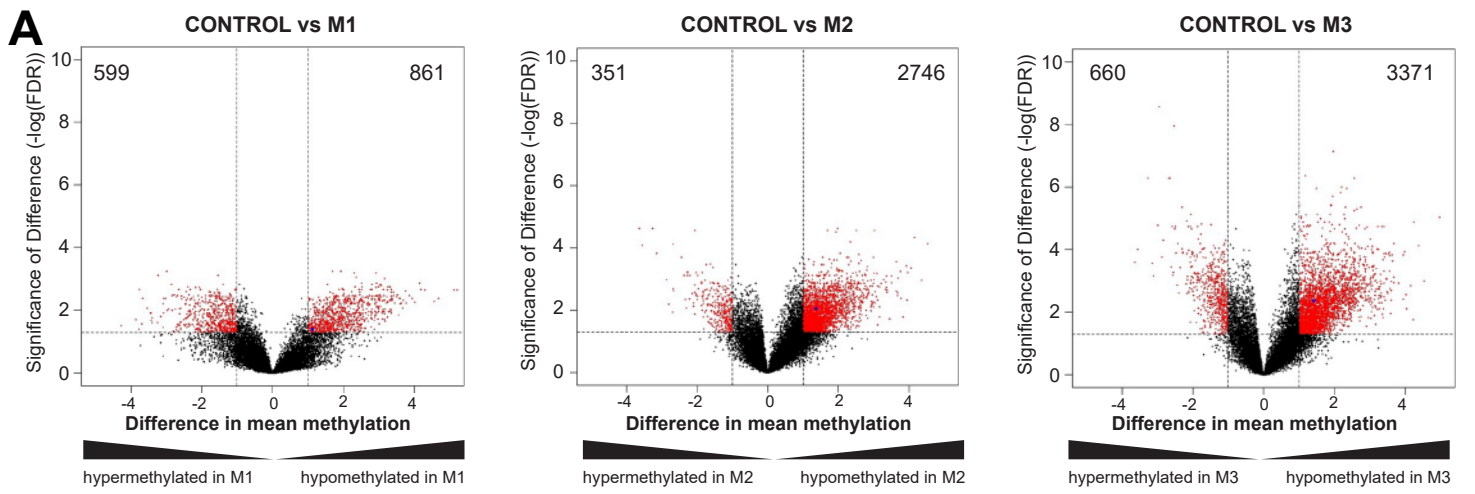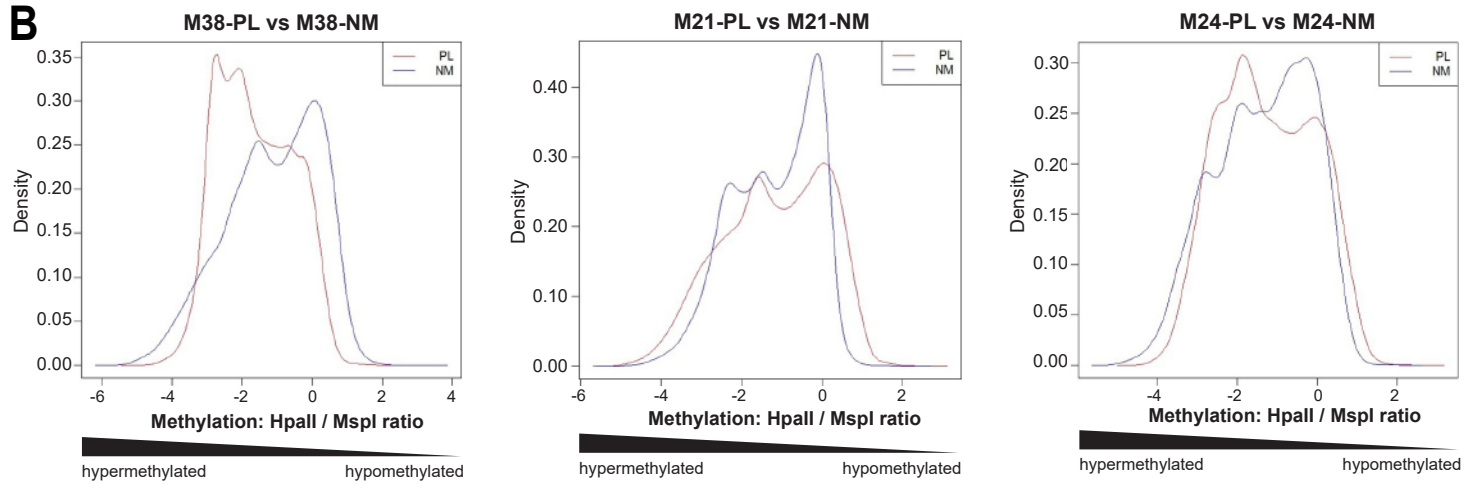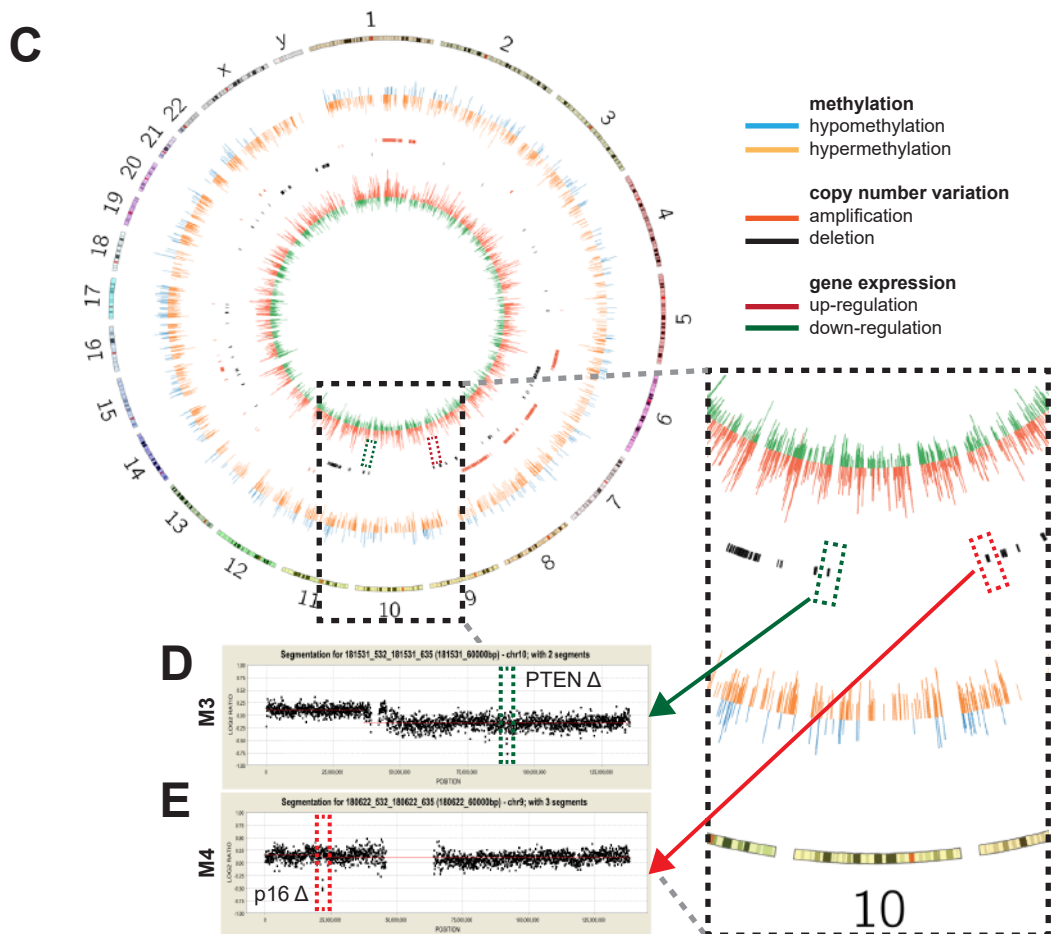

**Figure S1**

## Supplemental Figure 1.

Volcano Plot showing difference of mean methylation (X Axis) and statistical significance of the difference (Y Axis) in epigenomic clusters M1, M2 and M3 compared to the controls, and displaying increasing hypomethylation. The number of differentially methylated loci are indicated above each Volcano Plot. Numbers to the left indicate hypermethylated loci and numbers to the right indicate hypomethylated loci in melanoma. The single dark blue point in all three Volcano Plots denote the *CSF1R*. A False Discovery Rate (FDR) of less than 5% is used as a marker of significant differences (A). DNA methylation in matched primary and metastatic samples. The normalized mean HpaII/MspI log ratios are plotted as density histograms for each serial primary lesion and metastatic sample pair, where higher log HpaII/MspI ratio means less methylation. It is apparent that for the metastatic samples (blue curve), the majority of loci falls into the more hypomethylated state as compared to the more hypermethylated matched primary melanoma samples (red plot) (B). Integrative analysis shows that differentially methylated regions in melanoma display specific functional and genomic characteristics: Circos plots showing differentially methylated (outer circle), copy number alterations (middle circle) and gene expression differences (inner circle) in melanoma samples (C). Deletions of *PTEN* (D) and *p16* (E) genes are shown for individual representative samples

**A**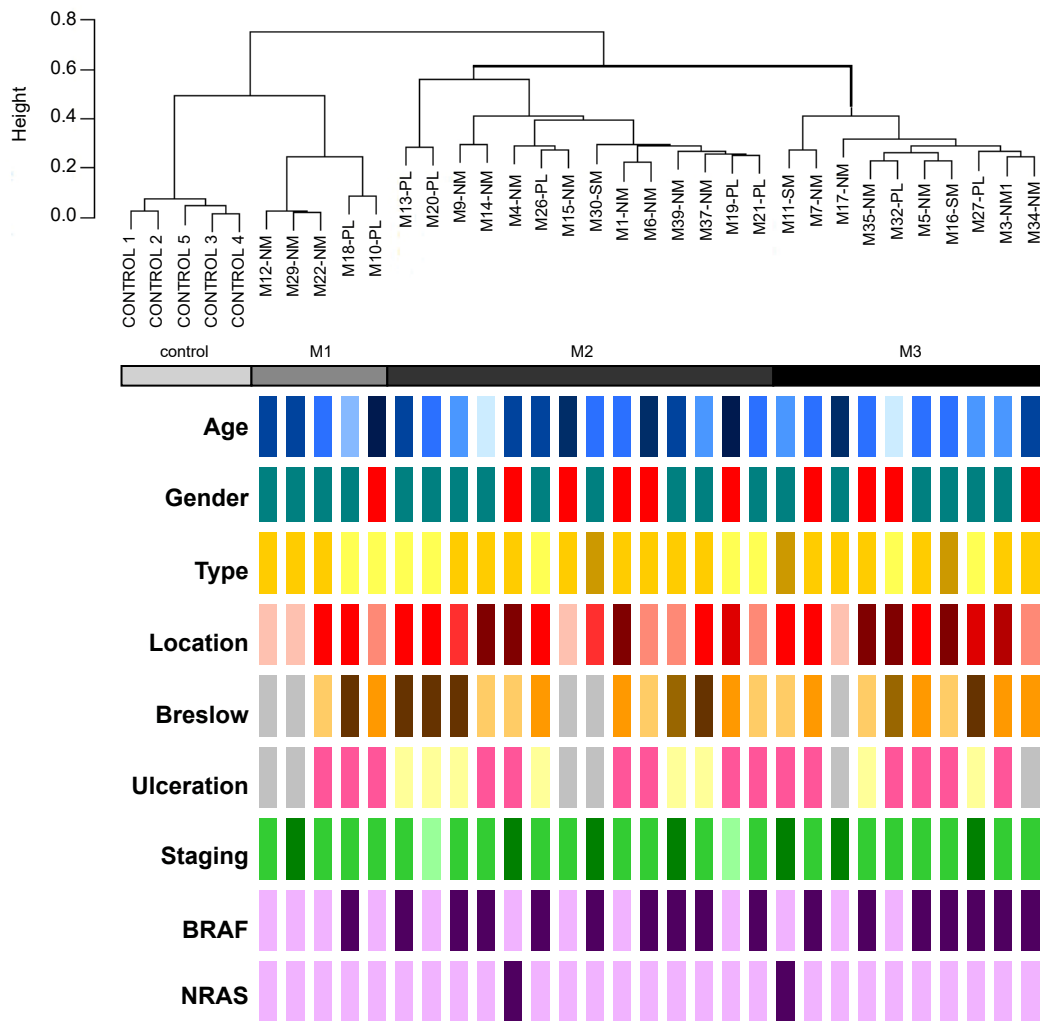**B**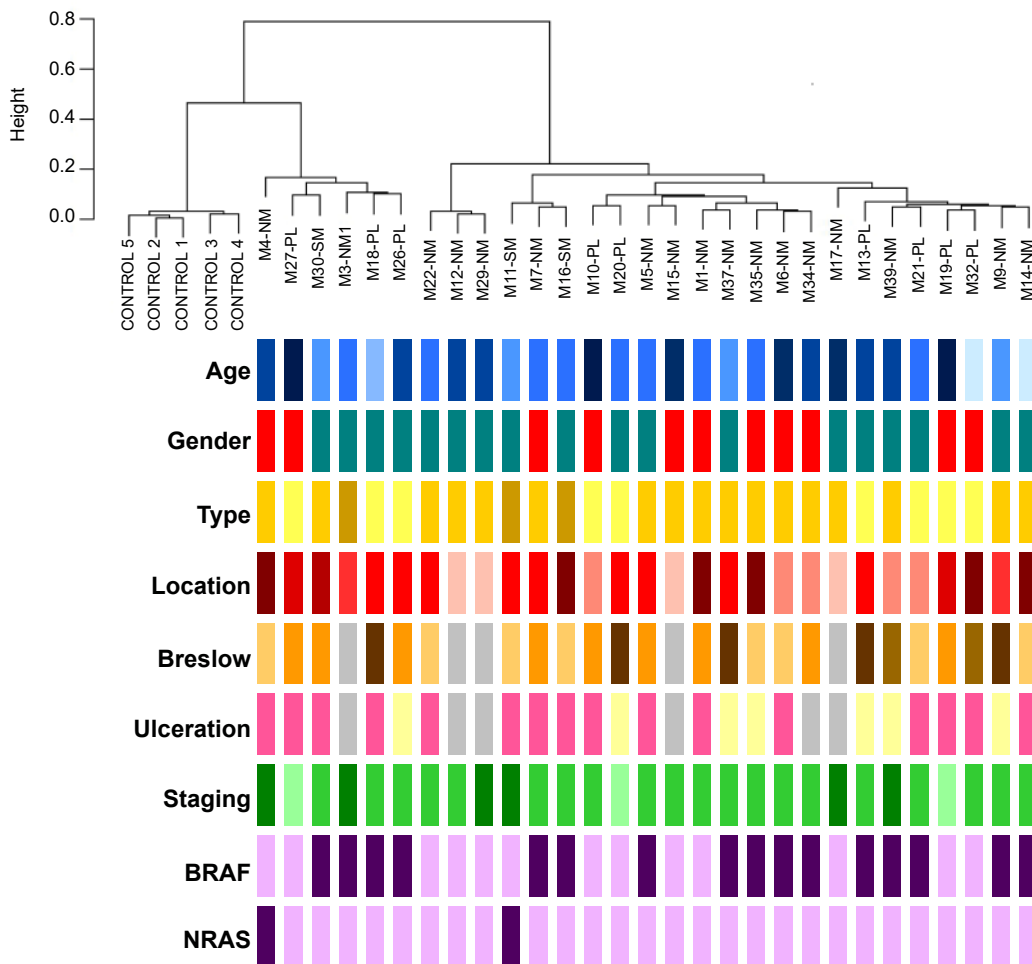**Figure S2**

## Supplemental Figure 2

Melanoma is characterized by aberrant DNA hypomethylation: unsupervised hierarchical clustering of methylation profiles generated by the HELP assay can distinguish melanoma samples from healthy melanocyte controls. The melanoma samples are separated in three major clusters with increasing dissimilarity from normal controls. Unsupervised clustering reveals that methylation profiles are independent of patient demographics (Age/Sex), mutational status, stage and extent of tumor. (PL: Primary Lesion; NM: Nodal Metastasis; SM: Soft tissue Metastasis) (**A**). Unsupervised hierarchical clustering of gene expression profiles can distinguish melanoma samples from healthy melanocyte controls (**B**).

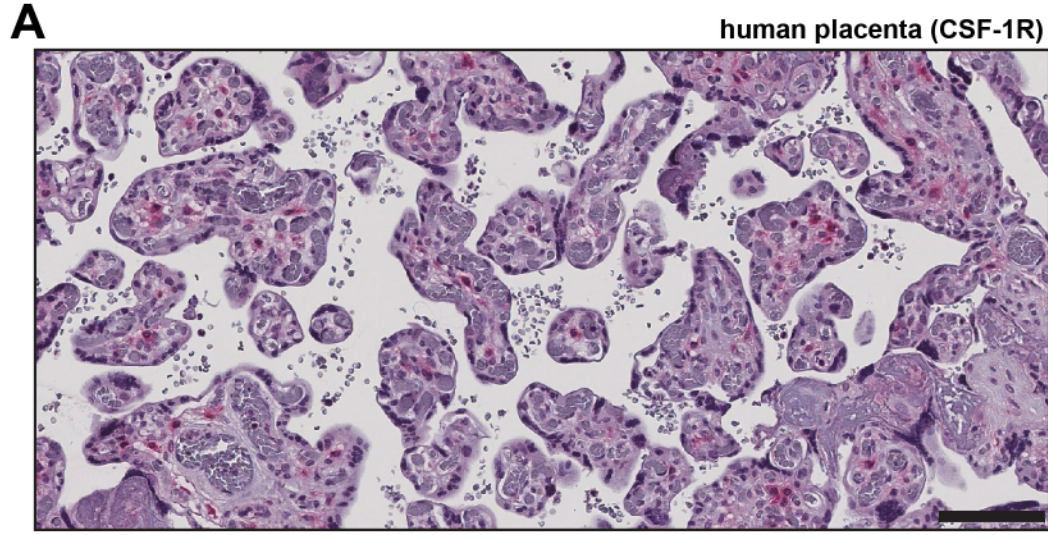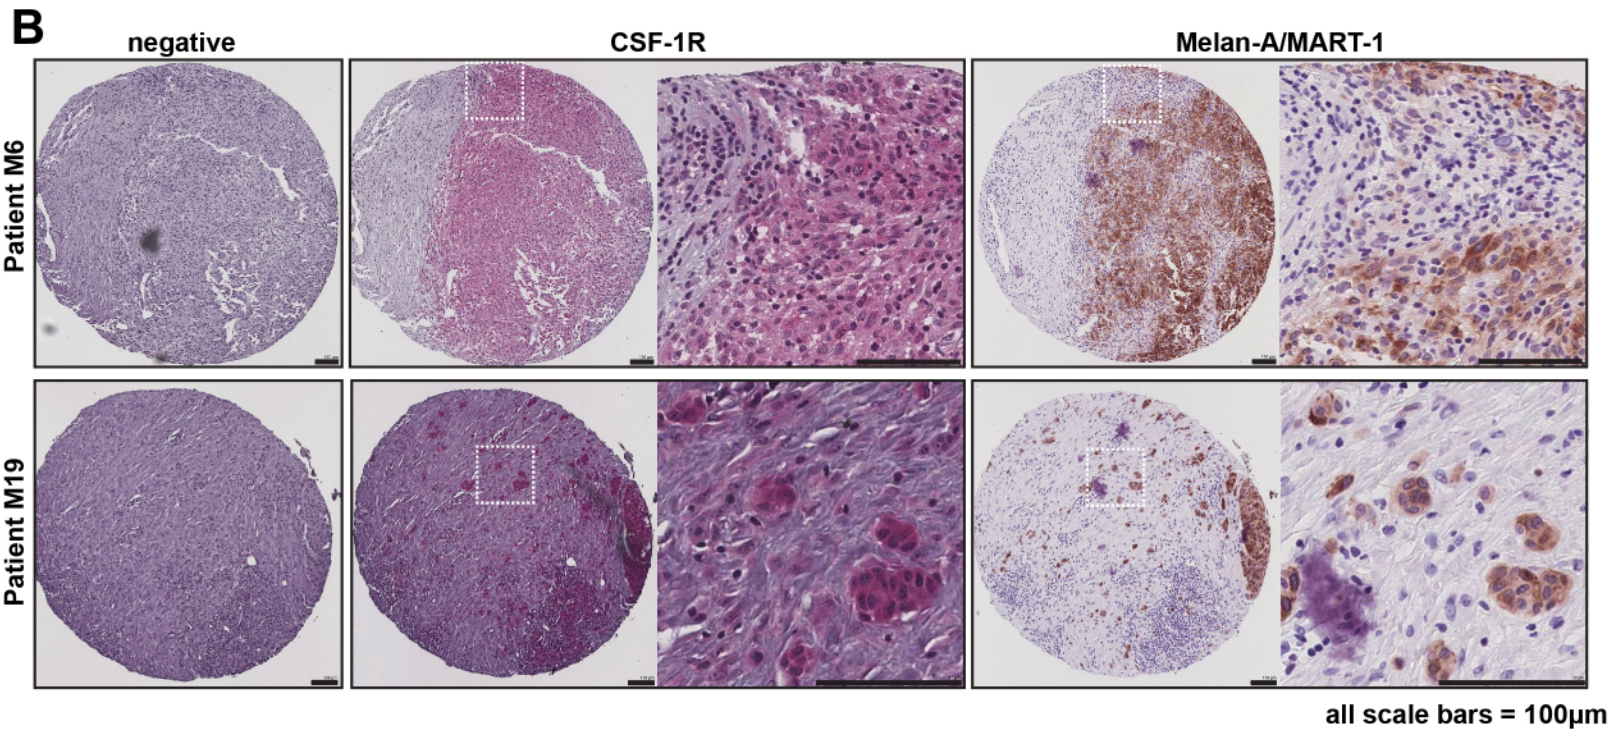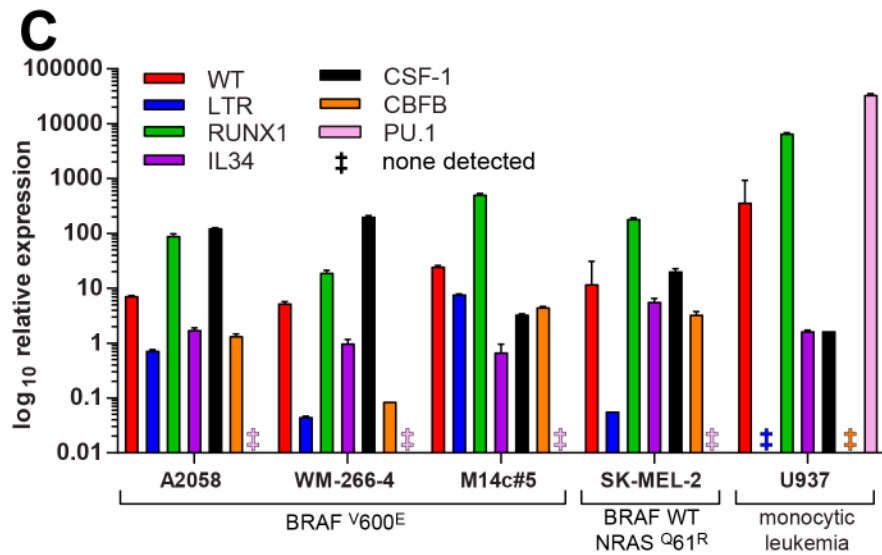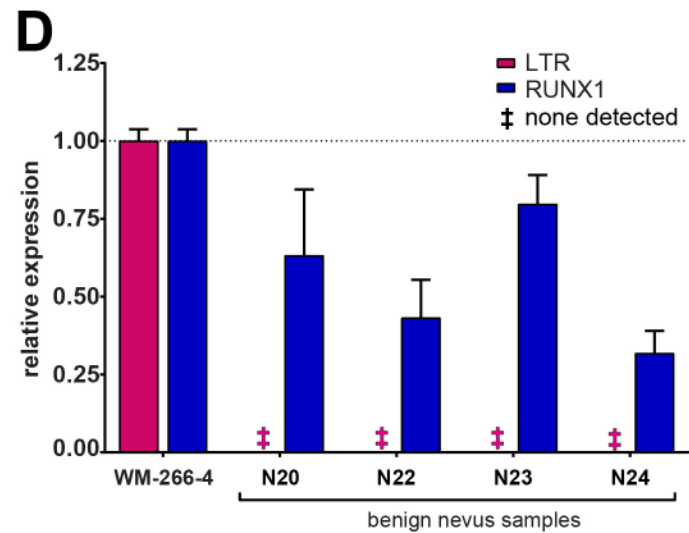

**Figure S3.**

### Supplemental Figure 3

Immunohistochemistry staining of CSF-1R: placenta control (**A**) and representative images of primary samples along with MelanA-counterstain (**B**). Gene expression analysis (quantitative RT-PCR, mean $\pm$ SEM) in cell lines of the canonical *CSF1R* (WT) and of the viral (LTR) transcripts, as well as of the two ligands (CSF-1, IL-34), the transcription factor RUNX1, its co-factor CBF $\beta$  (CBFB) and of PU.1. Cell-lines used: three BRAF V600E mutant melanoma cell lines, one BRAF WT cell line, and a monocytic leukemia cell-line as control (**C**). Gene expression analysis (quantitative RT-PCR, mean $\pm$ SEM) in benign nevus (birthmark) samples demonstrates no detection of the LTR form of the *CSF1R* mRNA (**D**).

**A**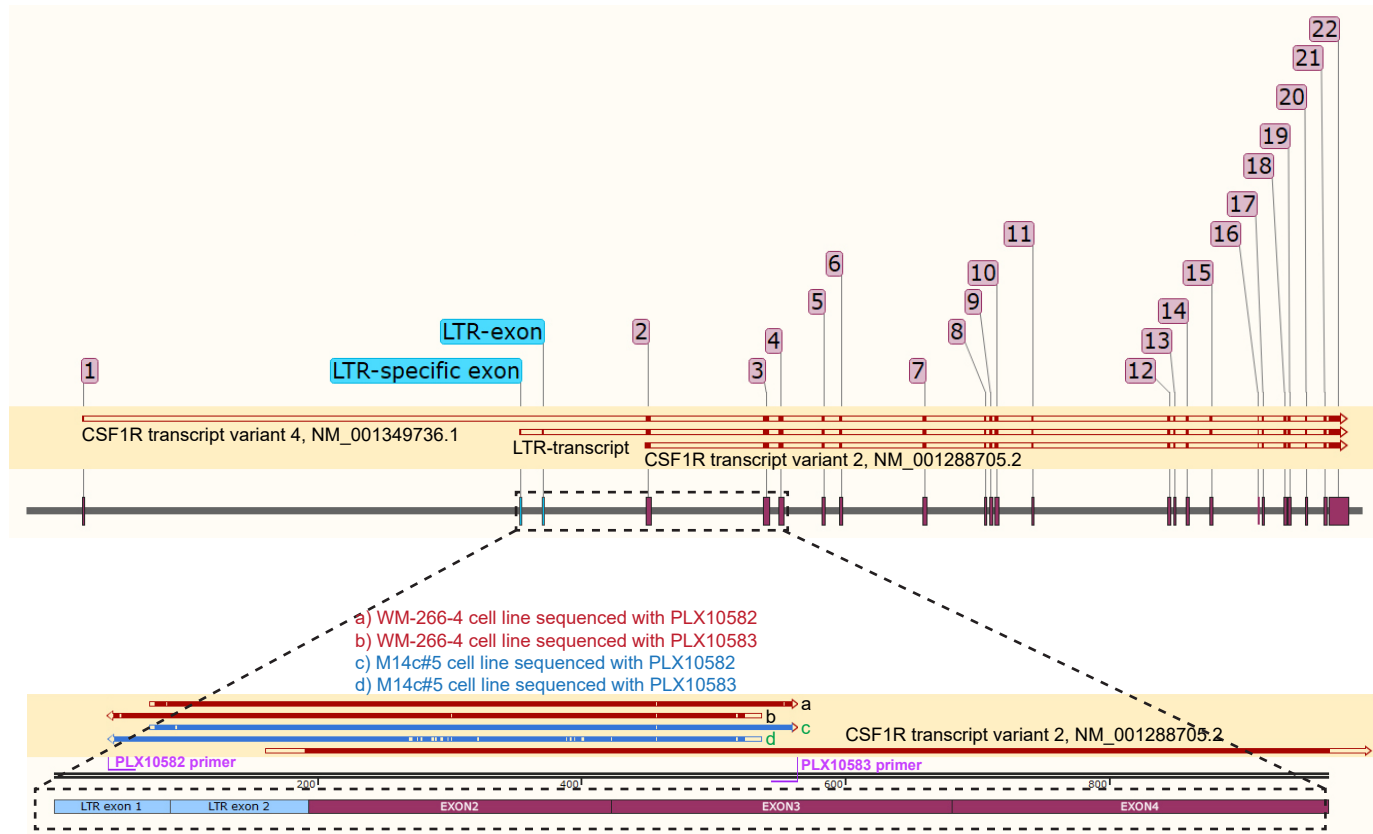**B**

chr5:148,904,955

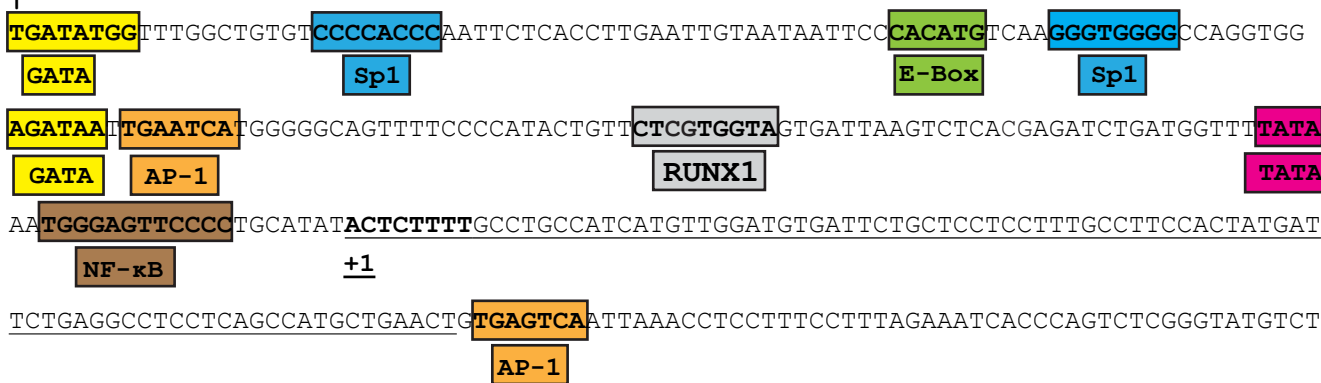

TTATTAGCAGTATGAGAACAGACTAATACA (chr5:148,904,605)

**C**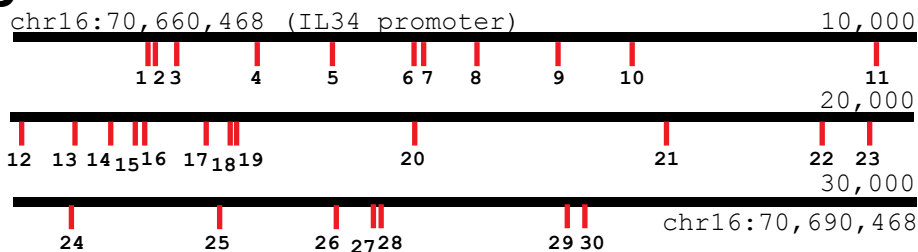**E**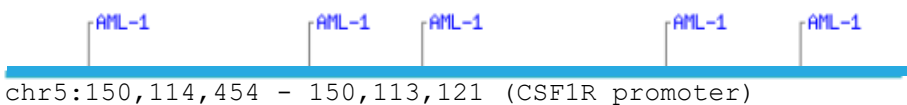**F**

| sequence    | from      | -to       | score  |
|-------------|-----------|-----------|--------|
| 1 TACCCAG   | 148904731 | 148904739 | 6.100  |
| 2 TACCAAAGA | 148905059 | 148905067 | 5.847  |
| 3 TTTGTGGTC | 148905225 | 148905233 | 12.295 |
| 4 GCCACAGG  | 148905589 | 148905597 | 6.219  |
| 5 ACTGCGGCC | 148905788 | 148905796 | 6.513  |

**D**

| sequence     | from     | -to      | score  |
|--------------|----------|----------|--------|
| 1 TTTTGGTC   | 70662010 | 70662018 | 8.372  |
| 2 ATTGTGGTC  | 70662063 | 70662071 | 12.295 |
| 3 TTTGTGTT   | 70662321 | 70662329 | 7.944  |
| 4 TCTGAGGTT  | 70663224 | 70663232 | 8.077  |
| 5 CATGTGGTT  | 70664057 | 70664065 | 9.467  |
| 6 TTTGTGGTT  | 70664961 | 70664969 | 12.626 |
| 7 TCTTGGTT   | 70665078 | 70665086 | 7.426  |
| 8 CCAAGTGGTT | 70665664 | 70665672 | 7.468  |
| 9 TTTGTGTT   | 70666564 | 70666572 | 7.944  |
| 10 TTTGAGGTC | 70667397 | 70667405 | 9.023  |
| 11 TTTGTGTT  | 70670112 | 70670120 | 7.614  |
| 12 CCTGTGGTC | 70670560 | 70670568 | 10.065 |
| 13 TTTGTGTT  | 70671153 | 70671161 | 7.944  |
| 14 TATGTGGTA | 70671562 | 70671570 | 8.842  |
| 15 TCTGTGGTT | 70671822 | 70671830 | 11.349 |
| 16 TTTGTTGTC | 70671928 | 70671936 | 7.614  |
| 17 ACTGTGGGT | 70672621 | 70672629 | 7.503  |
| 18 GTTGTGGTA | 70672883 | 70672891 | 8.344  |
| 19 TCTGTGGCT | 70672948 | 70672956 | 7.503  |
| 20 CTTGAGGTC | 70674957 | 70674965 | 8.07   |
| 21 ATTGTGATT | 70677754 | 70677762 | 7.944  |
| 22 TGTGTGGTT | 70679482 | 70679490 | 9.296  |
| 23 ACTGAGGTC | 70680000 | 70680008 | 7.747  |
| 24 CTTGTGGGT | 70681175 | 70681183 | 7.826  |
| 25 CTTGTGGCC | 70682823 | 70682831 | 7.496  |
| 26 CTTGAGGTT | 70684121 | 70684129 | 8.4    |
| 27 CTTGTGGAC | 70684545 | 70684553 | 7.496  |
| 28 TCTGTGGTT | 70684598 | 70684606 | 11.349 |
| 29 TTAGTGGTT | 70686689 | 70686697 | 9.698  |
| 30 CTTGAGGTC | 70686890 | 70686898 | 8.07   |

## Supplemental Figure 4

Detailed sequencing showing of the presence of the LTR-form of *CSF1R* transcript in two melanoma cell lines: WM-266-4 and A2058. Alignment performed with SnapGene® software (from GSL Biotech; available at [snapgene.com](http://snapgene.com)). (A). Genomic sequence of the *CSF1R* LTR (chr5:148,904,955-148,904,605): the 5' UTR of the melanoma cell lines from the transcription start site (marked as +1) to the first splice site is underlined. GATA, Sp1, E-Box, AP-1, NF-κB and RUNX1 indicate putative transcription factor binding sites; TATA indicates a TATA box (B). Schematic (C) and tabular representation (D) of the putative RUNX1 binding sites in the *IL-34* promoter (chr16:70,660,468-70,690,468). Schematic (E) and tabular representation (F) of the putative RUNX1 binding sites in the *CSF1R* promoter (chr5: 150,114,454-150,113,121). ConSite TF cutoff score: 85%.



**A**

|                 |    | <u>24h</u>    |     | <u>48h</u>    |  |
|-----------------|----|---------------|-----|---------------|--|
|                 |    | p             |     | p             |  |
| A2058-shCSF1R#1 | ** | <b>0.0031</b> | *   | <b>0.012</b>  |  |
| A2058-shCSF1R#5 | ns | 0.0717        | **  | <b>0.002</b>  |  |
| A2058-shRUNX1#1 | *  | <b>0.0423</b> | **  | <b>0.0037</b> |  |
| A2058-shRUNX1#4 | *  | <b>0.0123</b> | *** | <b>0.0001</b> |  |
| M14-shCSF1R#1   | ns | 0.1468        | **  | <b>0.002</b>  |  |
| M14-shCSF1R#5   | *  | <b>0.0221</b> | **  | <b>0.0017</b> |  |
| M14-shRUNX1#1   | *  | <b>0.0246</b> | ns  | 0.0537        |  |
| M14-shRUNX1#4   | *  | <b>0.0368</b> | **  | <b>0.0059</b> |  |

**B**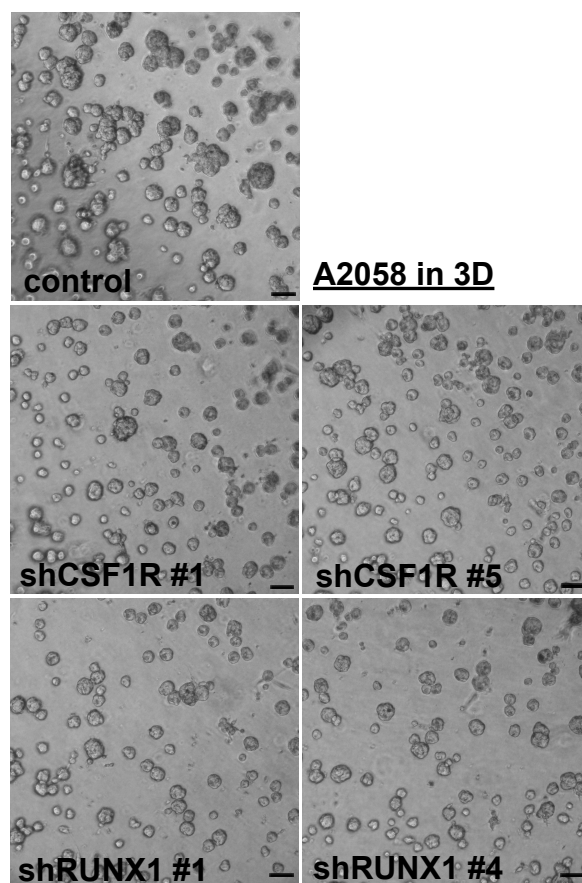**C**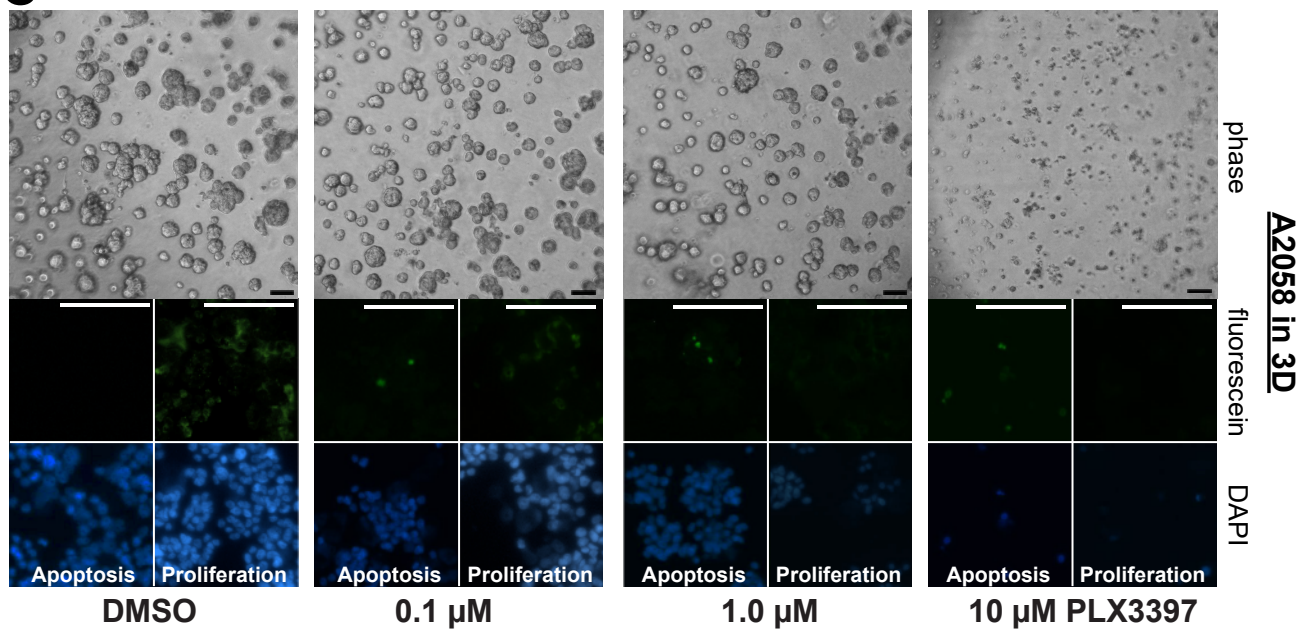**D**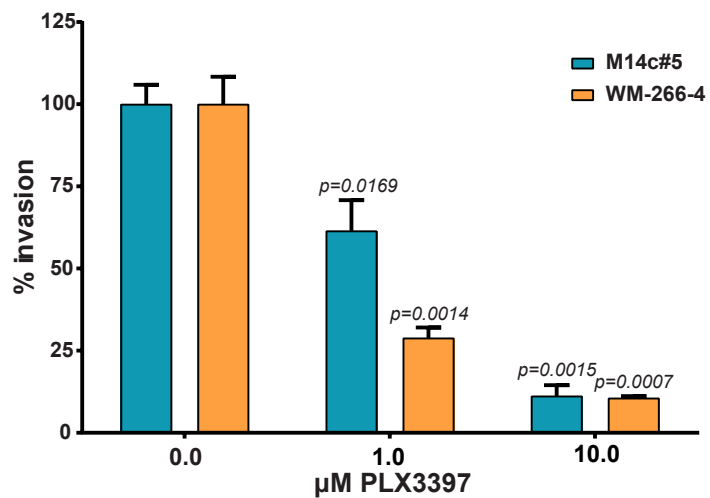**Figure S5**

## Supplemental Figure 5

Statistical analysis (one-way ANOVA) of the proliferation of the shCSF1R and shRUNX1 stable A2058 and M14c#5 cell lines as compared to the non-targeting control (**A**). Magnified images of the *CSF1R* and *RUNX1* stable A2058 clones in 3D culture on day 5 (**B**). Magnified images of A2058 treated with three different doses of PLX3397 in 3D, showing green for proliferation (BrdU-assay, fluorescein) or apoptosis (TUNEL, fluorescein) observed in these colonies. Nuclei counterstained with DAPI. All 3D images taken at 10X magnification. Scale bar (black bar in phase contrast images, white bar in fluorescent images): 100 $\mu$ m (**C**). Transwell invasion assay (mean $\pm$ SEM) of the M15c#5 and the WM-266-4 melanoma cell lines treated with PLX3397 (One-way ANOVA) (**D**).

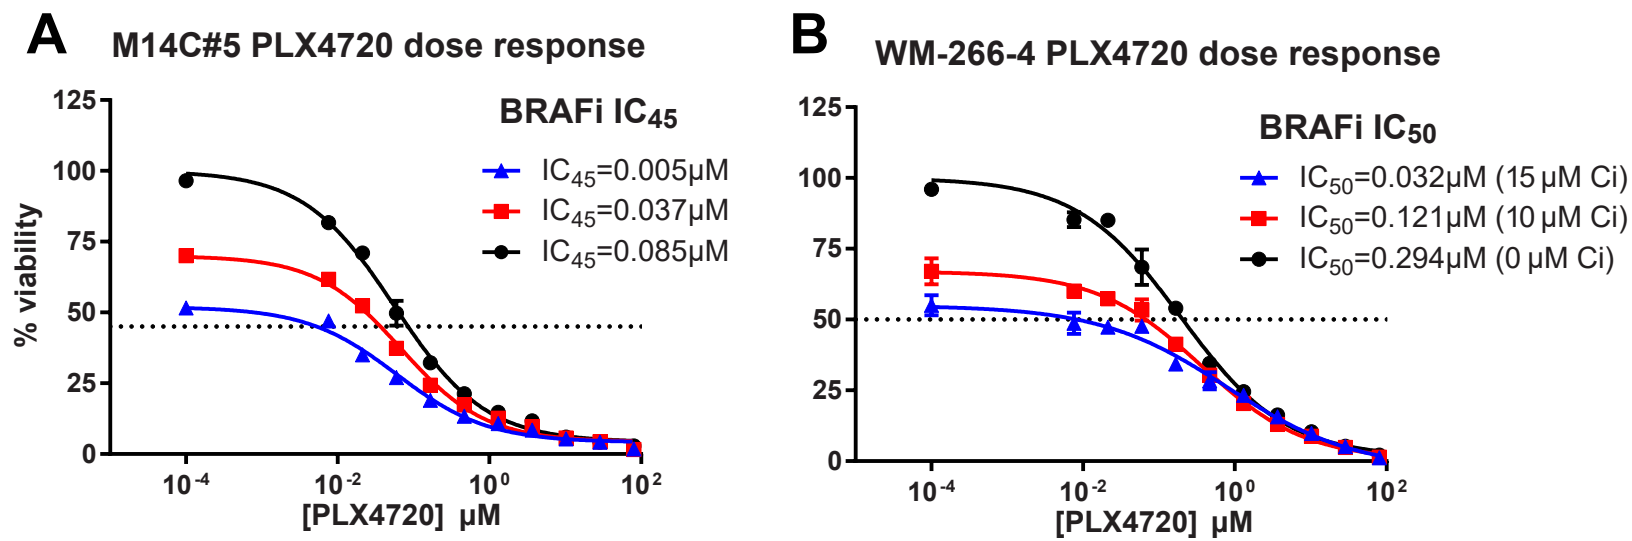

**C**

|          | Single agent                 | Combination                                   |             |                                               |             |
|----------|------------------------------|-----------------------------------------------|-------------|-----------------------------------------------|-------------|
|          | PLX4720<br>( $\mu\text{M}$ ) | 10 $\mu\text{M}$ PLX3397<br>( $\mu\text{M}$ ) | CI          | 15 $\mu\text{M}$ PLX3397<br>( $\mu\text{M}$ ) | CI          |
| M14      | 0.085                        | 0.037                                         | <b>0.91</b> | 0.005                                         | <b>0.78</b> |
| WM-266-4 | 0.294                        | 0.121                                         | <b>0.91</b> | 0.032                                         | <b>0.86</b> |

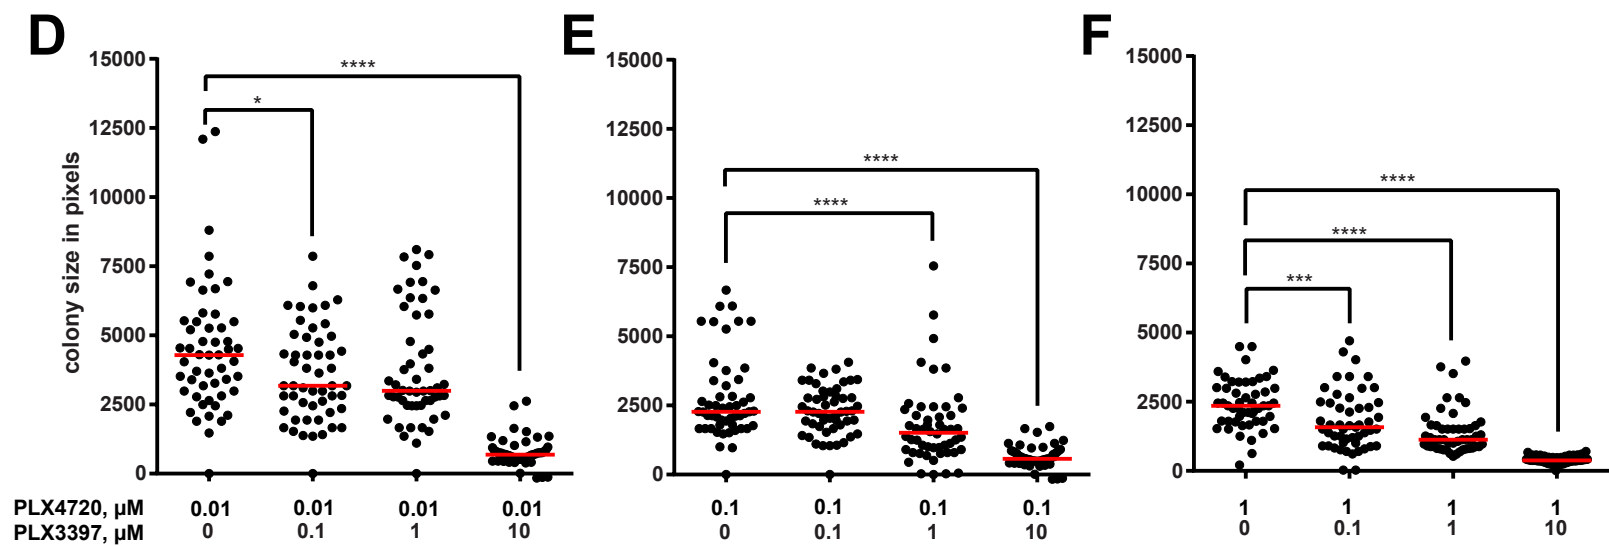

**G**

|                                   | p-value |
|-----------------------------------|---------|
| control vs. <b>PLX3397</b>        | 0.0003  |
| control vs. <b>PLX4720</b>        | 0.0012  |
| control vs. <b>PLX/PLX</b>        | <0.0001 |
| <b>PLX3397</b> vs. <b>PLX/PLX</b> | 0.0007  |
| <b>PLX4720</b> vs. <b>PLX/PLX</b> | <0.0001 |

Figure S6.

## Supplemental Figure 6

72 hour dose response curves for PLX4720 monotherapy or PLX4720 with fixed concentrations (10 or 15 $\mu$ M) of PLX3397 (Ci) for the M14c#5 (**A**) and the WM-266-4 (**B**) cell lines. Combination indices at IC<sub>45</sub> (M14c#5) or at IC<sub>50</sub> (WM-266-4) shown in table (**C**). Statistical analysis (one-way ANOVA, statistical significance levels are noted with asterisks, \*  $p \leq 0.05$ , \*\*  $p \leq 0.01$ , \*\*\*  $p \leq 0.001$ , \*\*\*\*  $p \leq 0.0001$ ) of the effect of combining the BRAF and the CSF1R inhibitors in 3D cell culture. Average colony size in pixels plotted for 0.01 $\mu$ M (**D**), 0.1 $\mu$ M (**E**) or 1 $\mu$ M PLX4720 (**F**) combined with 3 different doses of PLX3397. Tumor size (mean  $\pm$ SEM) in A2058 xenografted mice treated with PLX3397 and PLX4720 or with combination, 10 mice in each group (**G**) and statistical analysis of tumor size, one-way ANOVA (**I**). Statistical analysis of survival of xenografted mice treated with BRAF- or CSF1R-monotherapy or combination therapy (**H**).

**A****Timeline of 96h time course experiment**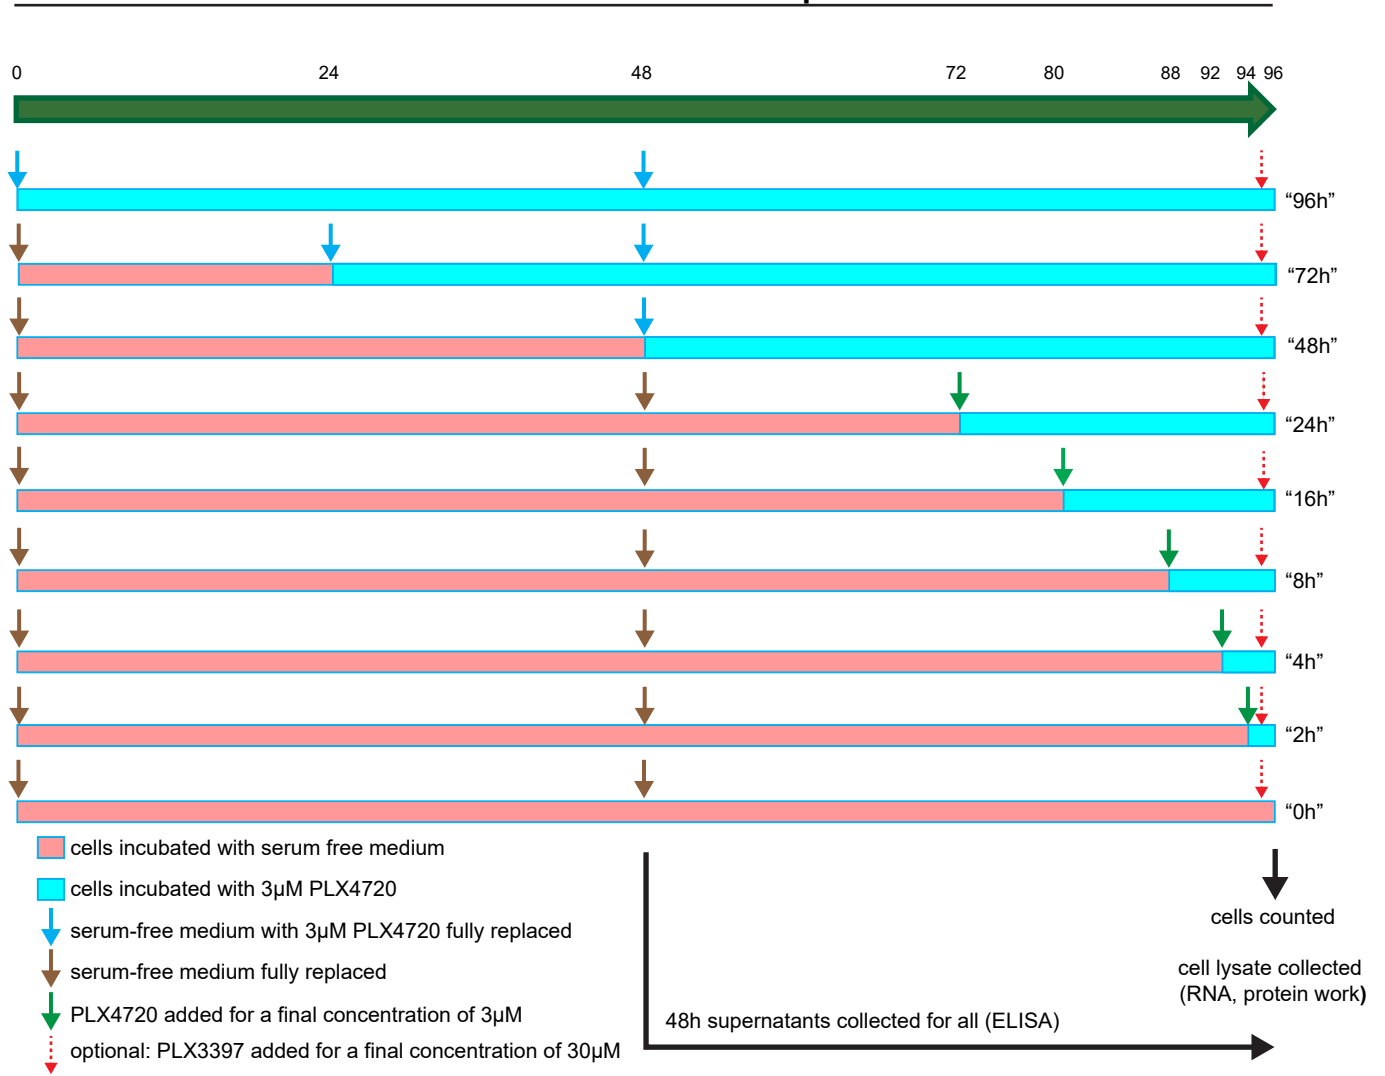**B**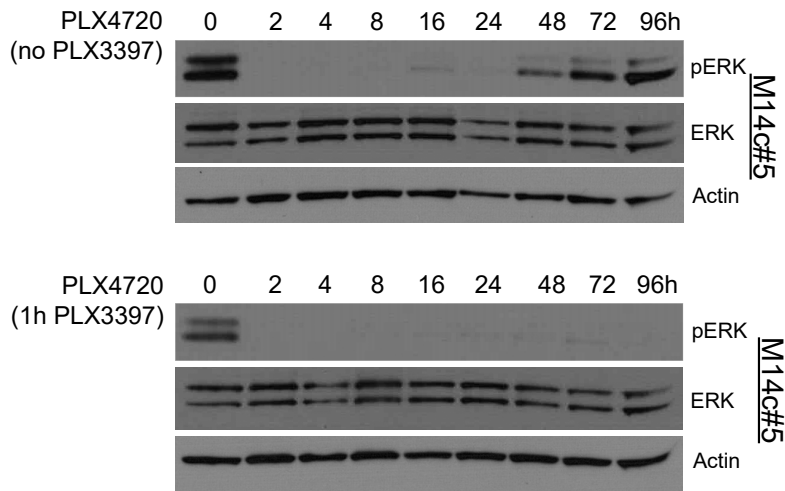**C**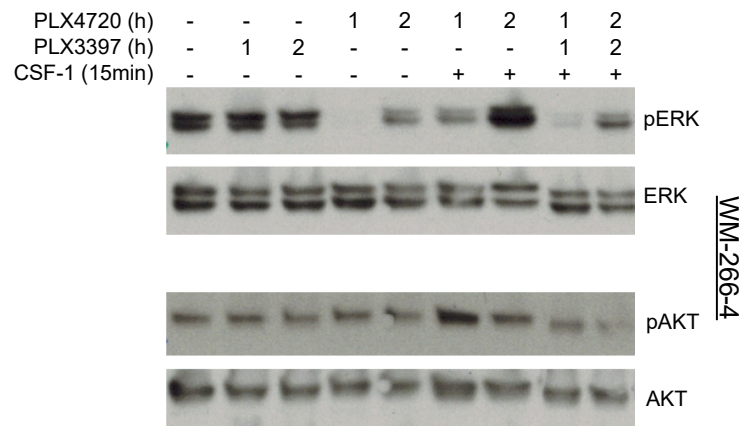**Figure S7.**

## Supplemental Figure 7

Schematic representation of the 96h BRAF-V600E inhibition experiments. Cells are seeded in full growth medium. On day one, all wells are replaced with either serum-free medium (SFM) or 3 $\mu$ M PLX4720 in SFM (“96h” condition). Cell culture media are replaced with either SFM or SFM with the drug according to the timeline. In the last 48h, all medium is refreshed and from this point, drug is added to the media already present in order to ensure that the supernatants are conditioned by the cells for exactly 48 hours. For the combination experiment, 30 $\mu$ M PLX3397 is added to the cultures in the final hour of the 96h time course (**A**). The effect of combined PLX3397/PLX4720 treatment on signaling in M14c#5. The levels of pERK1/2, total ERK1/2 and actin are shown after a 96h 3 $\mu$ M PLX4720 time course treatment with or without 30 $\mu$ M PLX3397 added in the last hour (**B**). The effect of CSF-1 on the rebound of ERK phosphorylation in WM-266-4 cells. The levels of pERK1/2, total ERK1/2, pAKT, total AKT and actin are shown after a 1 or 2h treatment with 3 $\mu$ M PLX4720 with or without 30 $\mu$ M PLX3397 with 100ng/ $\mu$ L rCSF-1 of added in the last 15 min (**C**).
